# Supplementary material for: Glycerol Valorization towards a Benzoxazine Derivative through a Milling and Microwave Sequential Strategy
Source: Molecules. 2022 Jan 19;27(3):632. doi: 10.3390/molecules27030632 (PMC8838984; doi:10.3390/molecules27030632)
Supplement: Supplementary file 1 [file molecules-27-00632-s001.zip › molecules-1530409-supplementary.pdf]

Table S1. Set of experiments under ball milling conditions.

| Exp. | Glycerol (eq.) | Solvent (1 mL) | Time (min) | Speed (rpm) | C (%) | S P2(%) |
|------|----------------|----------------|------------|-------------|-------|---------|
| 1    | 1              | -              | 60         | 350         | < 1   | -       |
| 2    | 2              | -              | 60         | 350         | < 1   | -       |
| 3    | 3              | -              | 60         | 350         | < 1   | -       |
| 4    | 1              | -              | 120        | 350         | < 1   | -       |
| 5    | 2              | -              | 120        | 350         | < 1   | -       |
| 6    | 3              | -              | 120        | 350         | < 1   | -       |
| 7    | 1              | -              | 120        | 400         | < 1   | -       |
| 8    | 2              | -              | 120        | 400         | < 1   | -       |
| 9    | 3              | -              | 120        | 400         | < 1   | -       |
| 10   | 1              | -              | 60         | 600         | < 1   | -       |
| 11   | 1              | -              | 120        | 600         | 4     | 5       |
| 12   | 1              | -              | 60         | 1000        | 6     | 6       |
| 13   | 1              | -              | 120        | 1000        | 7     | 5       |
| 14   | 1              | Acetone        | 60         | 350         | < 1   | -       |
| 15   | 1              | Acetone        | 60         | 600         | 5     | 4       |
| 16   | 1              | Acetone        | 60         | 1000        | 7     | 3       |
| 17*  | 1              | -              | 60         | 350         | < 1   | -       |

Reaction conditions: 1 equivalent of 2-aminophenol (1 g), 1.4 equivalents of DEC (diethyl carbonate) (1.5 mL) and 0.1 equivalents of K<sub>2</sub>CO<sub>3</sub> (0.12 g) \* Employing phenol instead of 2-aminophenol.

**Table S2.** Set of experiments under microwave-assisted conditions.

| <b>Exp.</b> | <b>Glycerol<br/>(eq.)</b> | <b>t (min)</b> | <b>T (°C)</b> | <b>Power</b> | <b>Max.<br/>Pressure</b> | <b>C (%)</b> | <b>S P2(%)</b> |
|-------------|---------------------------|----------------|---------------|--------------|--------------------------|--------------|----------------|
| 18          | 1                         | 60             | 110           | 300          | 240                      | 9            | 92             |
| 19          | 2                         | 60             | 110           | 300          | 240                      | 8            | 25             |
| 20          | 3                         | 60             | 110           | 300          | 240                      | 9            | 20             |
| 21          | 1                         | 30             | 110           | 300          | 240                      | 10           | 32             |
| 22          | 1                         | 120            | 110           | 300          | 240                      | 12           | 45             |
| 23          | 1                         | 60             | 150           | 300          | 240                      | 25           | 35             |
| 24*         | 1                         | 60             | 110           | 300          | 240                      | > 99         | 98**           |

Reaction conditions: 1 equivalent of 2-aminophenol, (1 g), 1.4 equivalents of DEC (1.5 mL) and 0.1 equivalents of K<sub>2</sub>CO<sub>3</sub>. (0.12 g) \* Employing phenol instead of 2-aminophenol. \*\* Selectivity to aryloxypropanediol.

**Table S3.** Set of experiments under microwave and mechanochemical-assisted conditions.

| Exp. | Mechanochemical<br>activation | Microwave conditions |        |       |                  | C (%) | S P2(%) |
|------|-------------------------------|----------------------|--------|-------|------------------|-------|---------|
|      |                               | t (min)              | T (°C) | Power | Max.<br>Pressure |       |         |
| 23   | 30 min, 350 rpm               | 30                   | 110    | 300   | 240              | 20    | 80      |
| 24   | 30 min, 350 rpm               | 60                   | 110    | 300   | 240              | 30    | 92      |
| 25   | 60 min, 350 rpm               | 30                   | 110    | 300   | 240              | 25    | 81      |
| 26   | 60 min, 350 rpm               | 60                   | 110    | 300   | 240              | 38    | 93      |
| 27   | 60 min, 600 rpm               | 60                   | 110    | 300   | 240              | 46    | 26      |
| 28   | 60 min, 1000 rpm              | 60                   | 110    | 300   | 240              | 57    | 7       |

Reaction conditions: 1 equivalent of (2-aminophenol) (1 g), 1.4 equivalents of DEC (1.5 g) and 0.1 equivalents of K<sub>2</sub>CO<sub>3</sub> (0.12 g) Glycerol (1 eq.).

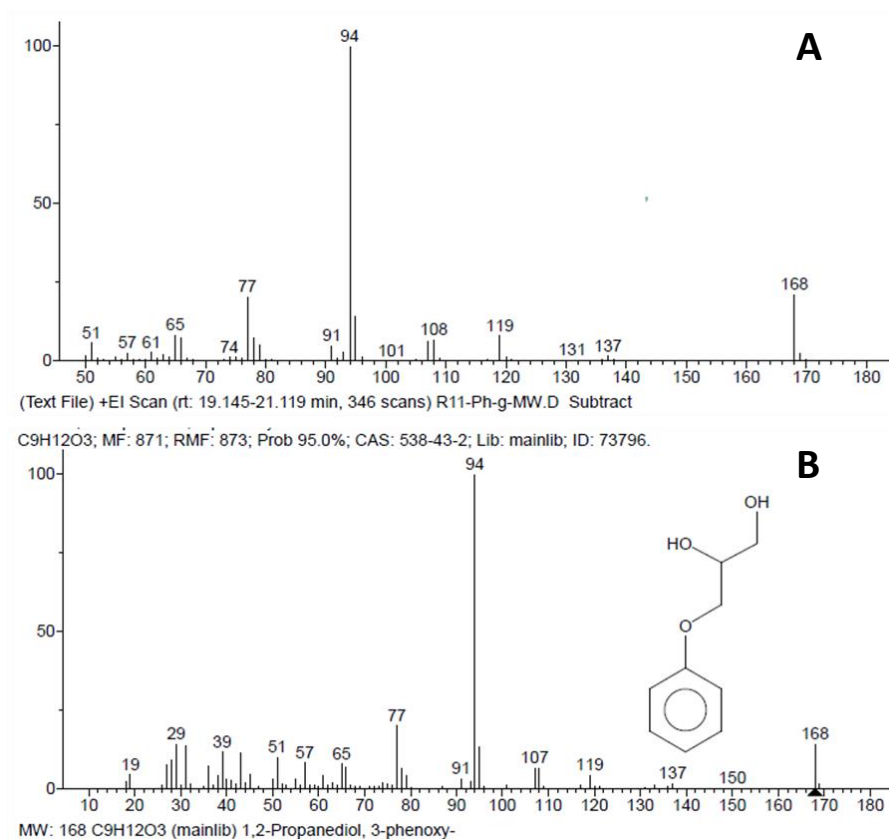

**Figure S1.** Comparison of MS-spectra A) MS-spectrum of the product from the reaction employing phenol, instead of 2-aminophenol. B) MS-spectrum reported in the NIST library.

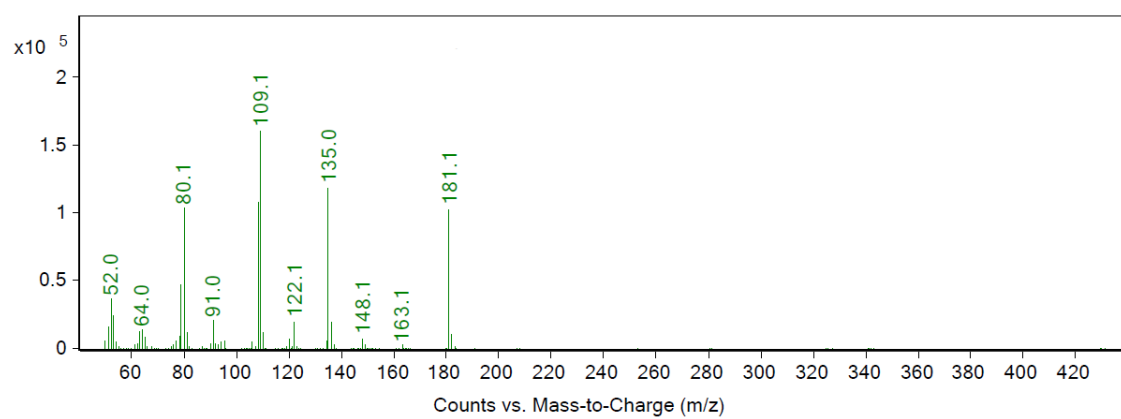

**Figure S2.** MS-spectrum of the obtained product by employing  $\text{K}_2\text{CO}_3$ , appearing at retention time of 11.8 min in the chromatograms.

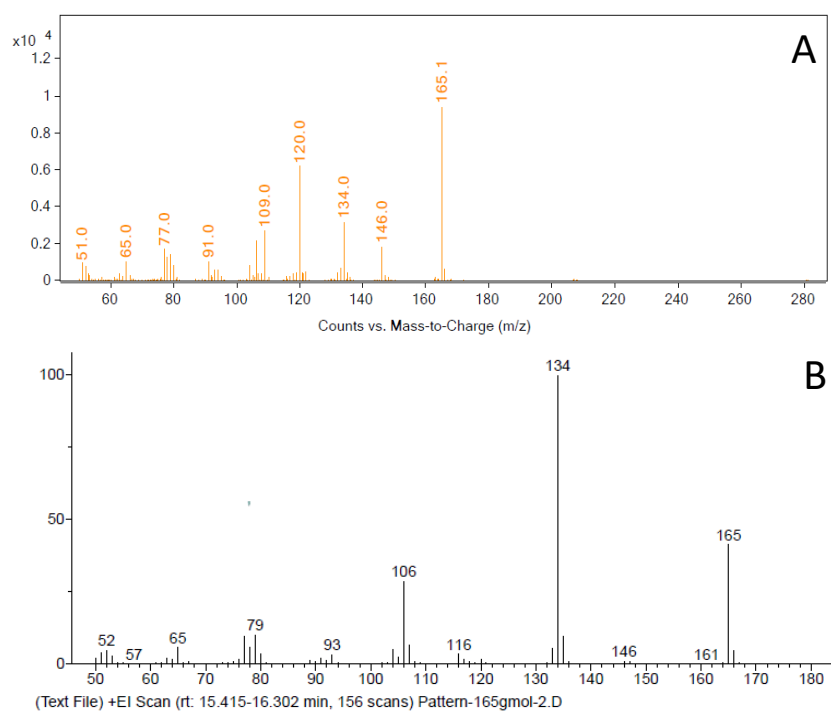

**Figure S3.** Comparison of MS-spectra of the product from the reaction, at retention time ca. 16 min, and the commercial pattern. A) MS-spectrum of the obtained product by employing  $\text{K}_2\text{CO}_3$ , appearing at retention time of 16.7 min in the chromatograms. B) MS-spectrum of the commercial pattern.

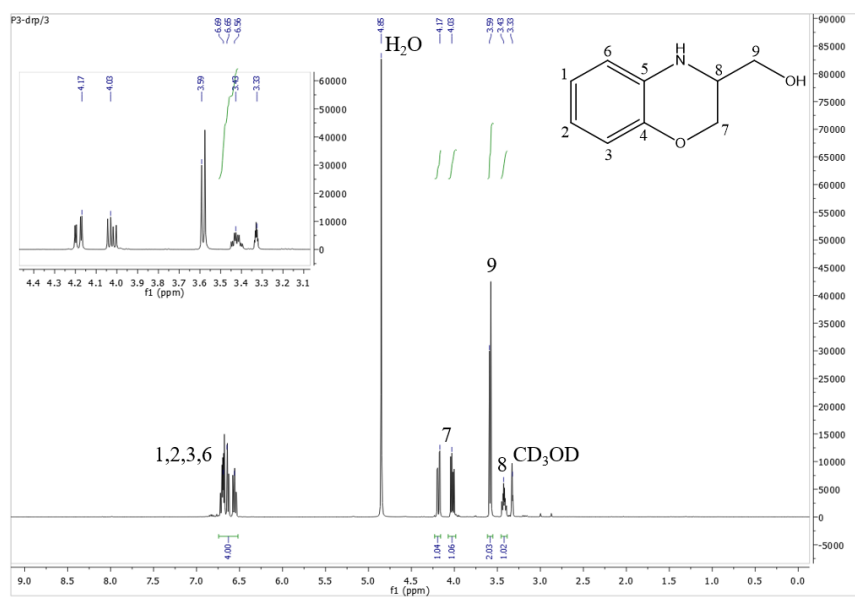

**Figure S4.**  $^1\text{H}$ -NMR -spectrum of the purified product, appearing at retention time of 16.7 min in the chromatograms.

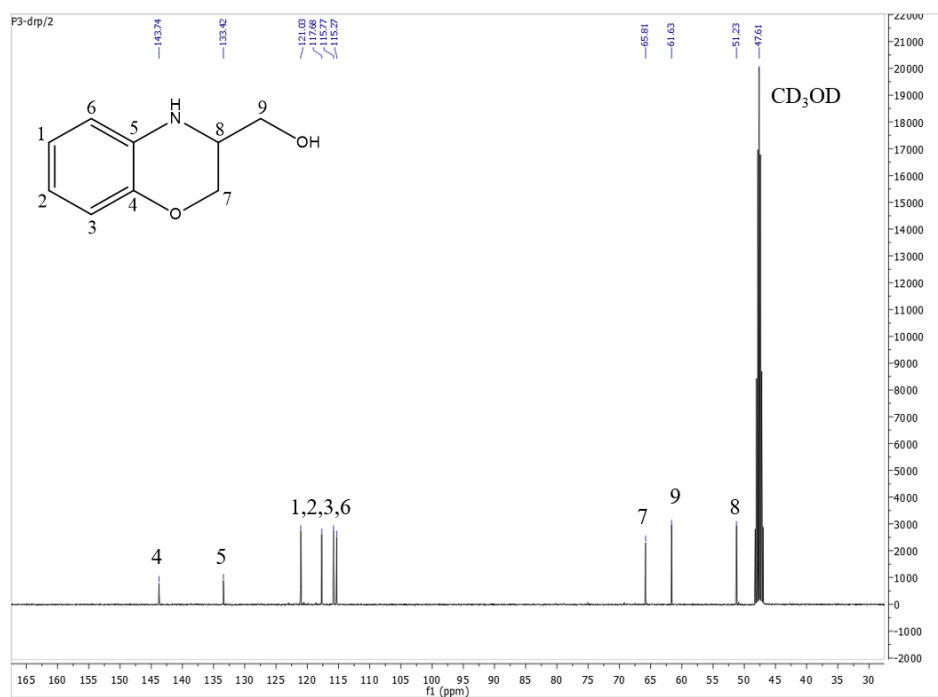

**Figure S5.**  $^{13}\text{C}$ -NMR -spectrum of the purified product, appearing at retention time of 16.7 min in the chromatograms.

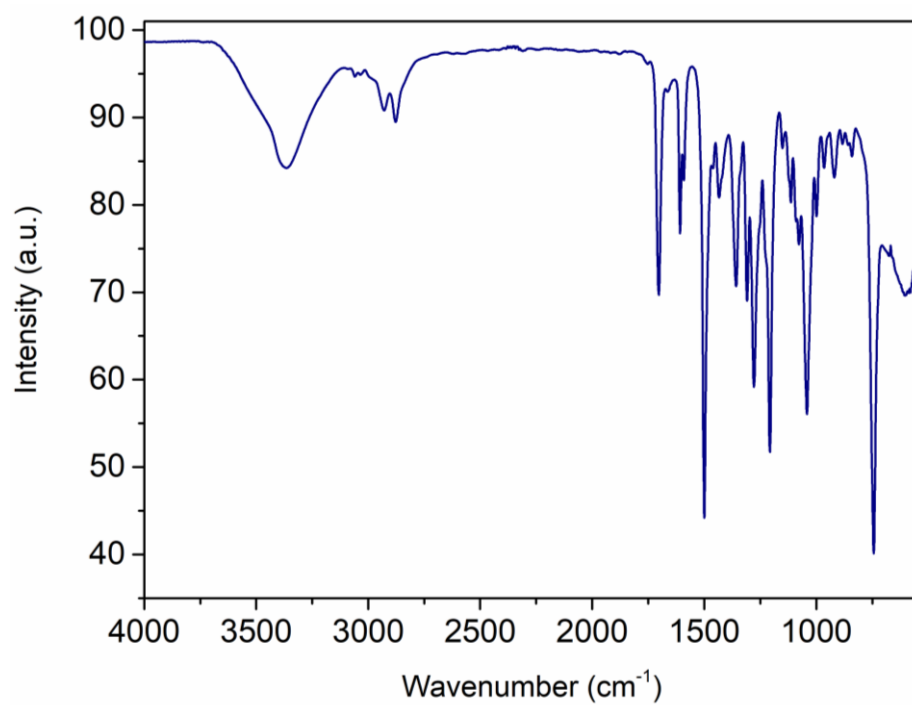

**Figure S6.** FT-IR spectrum of the purified product P2, appearing at retention time of 16.7 min in the chromatograms.

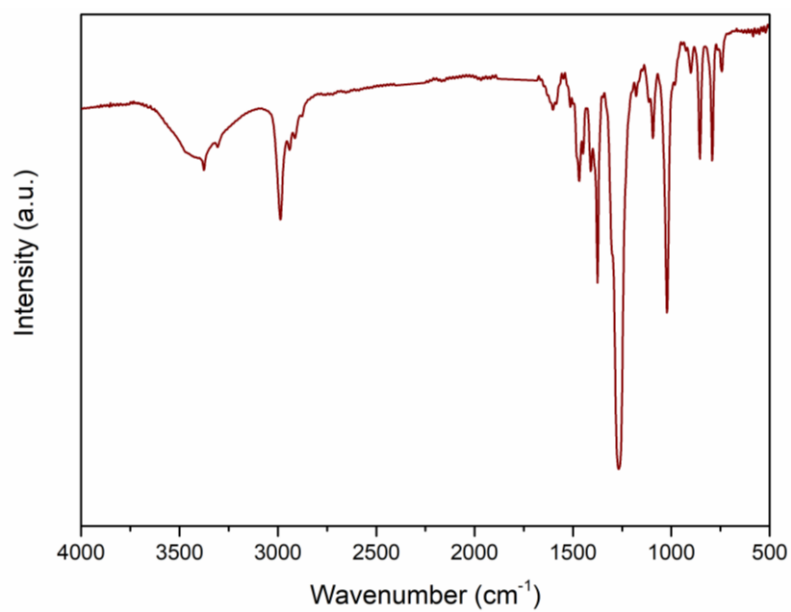

**Figure S7.** FT-IR spectrum of the purified product P1, appearing at retention time of 11.7 min in the chromatograms.

To perform the energy consumption assessment, as a rough measure, we approximated maximum power consumption, as stated in the Retsch PM (1250 W),<sup>1</sup> CEM microwave (1800 W)<sup>2</sup> and Parallel Reaction Station (800 W)<sup>3</sup> technical specifications. Taking this as our baseline, and considering the time employed in each case to achieve a conversion of 38% (obtained after 38 h for the conventional heating approach), we calculated the energy usage for both, the sequential mechanochemical-microwave assisted process and the conventional heating process, based on the following equation:

$$\text{Energy usage(kW} \cdot \text{h)} = \text{Power(kW)} \times \text{Duration(h)}$$

According to the aforementioned calculations energy usages of 3 KW/h and 30 KW/h was estimated for the sequential mechanochemical-microwave assisted process and for the conventional heating process, respectively. Even if further LCA analysis could be performed, this estimation revealed highly promising results in terms of energy efficiency.

<sup>1</sup><https://www.retsch.com/products/milling/ball-mills/planetary-ball-mill-pm-100/function-features/>

<sup>2</sup>[http://cem.com/media/contenttype/media/literature/516\\_Manual\\_MARS6\\_OperationManual\\_600284.pdf](http://cem.com/media/contenttype/media/literature/516_Manual_MARS6_OperationManual_600284.pdf)

<sup>3</sup><https://www.radleys.com/range/parallel-reaction-stations/>
